# Supplementary material
Source: publisher site journal article supplement (https://www.spandidos-publications.com/5105/downloadSupplementary)
Supplement: Supplementary file 1 [file downloadSupplementary]

## Sheet: Table S8
Table SVIII. Univariate Cox expression analysis of DNASE2.
Cancer	HR	HR.95L	HR.95H	P-value
ACC	0.821622	0.556175	1.21376	0.323694
BLCA	0.98055	0.758066	1.26833	0.881083
BRCA	0.937829	0.68418	1.28551	0.689933
CESC	0.538806	0.35788	0.811198	0.00305357
CHOL	0.893955	0.221829	3.60258	0.87474
COAD	1.47477	0.966927	2.24935	0.0712608
DLBC	0.25235	0.068237	0.933227	0.0390622
ESCA	1.14256	0.737572	1.76992	0.550626
GBM	1.3561	0.918477	2.00224	0.125468
HNSC	1.00657	0.820396	1.235	0.949939
KICH	25.8811	1.18407	565.704	0.0387041
KIRC	1.13014	0.843724	1.51379	0.411974
KIRP	1.03787	0.596316	1.80637	0.895417
LAML	0.902969	0.688621	1.18404	0.460402
LGG	1.50391	1.02498	2.2066	0.0369681
LIHC	1.0442	0.846377	1.28826	0.686511
LUAD	0.864307	0.672086	1.11151	0.255852
LUSC	0.786461	0.613287	1.00853	0.0583593
MESO	0.690655	0.43453	1.09775	0.117467
OV	0.920074	0.739468	1.14479	0.454976
PAAD	0.708838	0.403391	1.24557	0.231509
PCPG	0.472685	0.116079	1.92481	0.295591
PRAD	1.31499	0.472479	3.65986	0.600051
READ	0.658058	0.291134	1.48743	0.314552
SARC	0.624663	0.467509	0.834644	0.00146044
SKCM	0.829743	0.690345	0.99729	0.0467141
STAD	0.735207	0.544437	0.992823	0.0447538
TGCT	2.51373	0.687745	9.18775	0.16335
THCA	0.733023	0.179823	2.98806	0.664876
THYM	2.3589	0.914322	6.08581	0.0759426
UCEC	1.00505	0.701235	1.44049	0.97813
UCS	1.1952	0.824453	1.73266	0.346642
UVM	2.34164	0.779729	7.03228	0.129392
